# Supplementary material for: Increased cathepsin D protein expression is a biomarker for osteosarcomas, pulmonary metastases and other bone malignancies
Source: PubMed Central journal article supplement (PMC4599286; doi:10.18632/oncotarget.4140), 2015-05-14
Supplement: oncotarget-06-16517-s001.pdf [file oncotarget-06-16517-s001.pdf]

# Increased cathepsin D protein expression is a biomarker for osteosarcomas, pulmonary metastases and other bone malignancies

## Supplementary Material

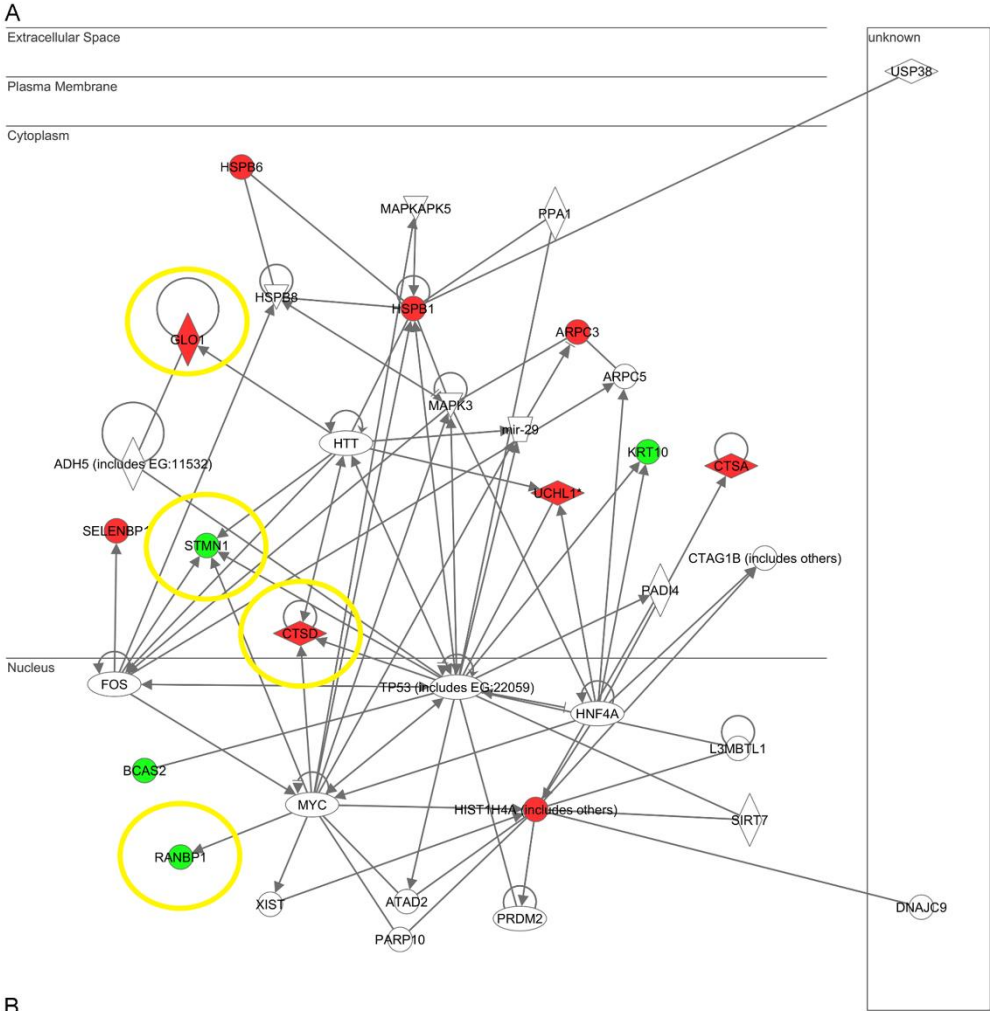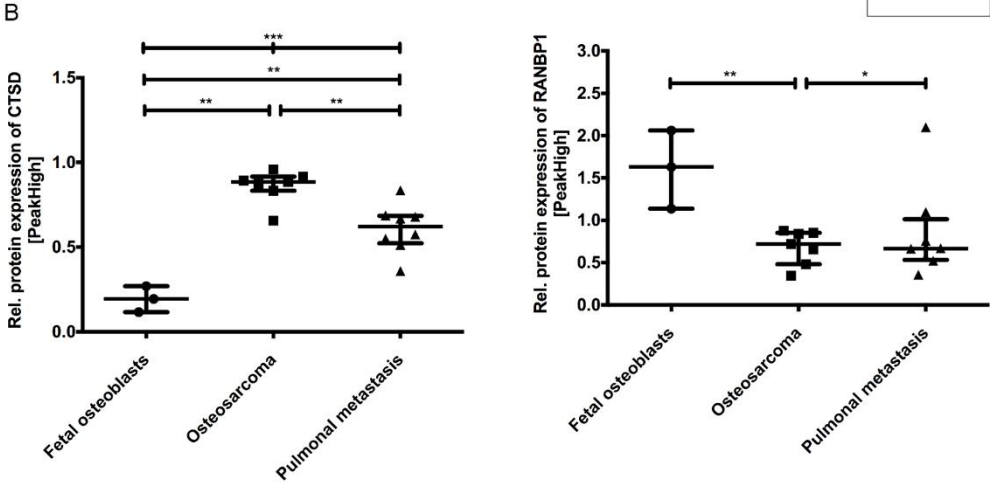

**Supplemental figure 1: (A) IPA-based pathway analysis of differential expressed proteins.** Proteins were colored by over- (red) and under-expression (green) between fetal osteoblasts, osteosarcoma and pulmonary metastasis cell lines. Yellow circles indicate targets

for validation by Western Blot. **(B) Western Blot analysis of validated target proteins CTSD (left) and RANBP1 (right).** CTSD is significantly lower expressed in fetal osteoblasts cell lines whereas RANBP1 is significantly higher expressed in fetal osteoblasts cell lines (\*\*\*:  $0.0001 < p < 0.001$ ; \*\*:  $0.001 < p < 0.01$ ; \*:  $0.01 < p < 0.05$ ). Plots show single protein expressions (peak high with normalization against ACTB) of each sample as well as median and interquartile range of each group.

**Supplemental table 1:** Evaluated patient cohort of the in-house compiled tissue microarray.

|                              | Sex    | Age<br>[years] | Origin        | Comment                                       |
|------------------------------|--------|----------------|---------------|-----------------------------------------------|
| <b>Normal bone tissues</b>   |        |                |               |                                               |
| Sample 1                     | male   | 39             | Tibia         |                                               |
| Sample 2                     | male   | 68             | Femur         |                                               |
| Sample 3                     | male   | 59             | Tibia         |                                               |
| Sample 4                     | male   | 27             | Femur         |                                               |
| <b>Osteosarcomas</b>         |        |                |               |                                               |
| Sample 1                     | male   | 14             | Humerus       | teleangiectatic                               |
| Sample 2                     | female | 59             | Femur         | chondroblastic                                |
| Sample 3                     | male   | 39             | Femur         | fibroblastic                                  |
| Sample 4                     | female | 89             | Femur         | fibroblastic                                  |
| Sample 5                     | male   | 35             | Mandibula     | chondroblastic                                |
| Sample 6                     | female | 75             | Tibia         | giant cell-like                               |
| Sample 7                     | male   | 64             | Mandibula     | -                                             |
| Sample 8                     | male   | 12             | Tibia         | osteoblastic                                  |
| Sample 9                     | female | 14             | Fibula        | teleangiectatic                               |
| Sample 10                    | male   | 38             | Tibia         | osteoblastic                                  |
| Sample 11                    | male   | 67             | Calvaria      | osteoblastic                                  |
| Sample 12                    | male   | 25             | Tibia         | osteoblastic                                  |
| Sample 13                    | male   | 74             | Mandibula     | chondroblastic                                |
| Sample 14                    | male   | 27             | Femur         | osteoblastic                                  |
| Sample 15                    | male   | 21             | Femur         | chondroblastic                                |
| Sample 16                    | male   | 21             | Femur         | chondroblastic                                |
| Sample 17                    | male   | 55             | Tibia         | -                                             |
| <b>Pulmonary metastases*</b> |        |                |               |                                               |
| Sample 1                     | male   | 14             | Inferior lobe | (teleangiectatic osteosarcoma in the humerus) |
| Sample 2                     | male   | 10             | Inferior lobe | (chondroblastic osteosarcoma in the femur)    |
| Sample 3                     | male   | 17             | Superior lobe | (chondroblastic osteosarcoma in the femur)    |
| Sample 4                     | female | 12             | Superior lobe | (osteosarcoma in the tibia)                   |
| Sample 5                     | female | 41             | Superior lobe | (osteoblastic osteosarcoma in the tibia)      |

\* Primary tumor of the pulmonary metastases is presented in brackets

**Supplemental Table 2:** Evaluated patient cohort of the commercially available tissue microarray (TMA; BO2081, US Biomax, Rockville, USA)

|                                   | <b>Sex</b><br>[male/female] | <b>Average age at diagnosis</b><br>[years] | <b>Range</b><br>[years] |
|-----------------------------------|-----------------------------|--------------------------------------------|-------------------------|
| <b>Osteosarcomas</b>              | 15/9                        | 24.9                                       | 10-69                   |
| <b>Chondrosarcomas</b>            | 7/2                         | 31.2                                       | 13-47                   |
| <b>Myelomas</b>                   | 7/2                         | 53.8                                       | 39-69                   |
| <b>Ewing's sarcomas</b>           | 0/2                         | 54.5                                       | 15-94                   |
| <b>Giant cell tumors</b>          | 3/8                         | 36.2                                       | 17-60                   |
| <b>Invasice giant cell tumors</b> | 6/3                         | 36.0                                       | 20-50                   |
| <b>Chordomas</b>                  | 1/1                         | 47.0                                       | 44-50                   |
| <b>Adamantinomas</b>              | 5/3                         | 42.3                                       | 11-70                   |
| <b>Bone cysts</b>                 | 1/5                         | 27.3                                       | 16-45                   |
| <b>Adjacent normal tissue</b>     | 6/2                         | 60.9                                       | 41-75                   |
